# Supplementary material
Source: PubMed Central journal article supplement (PMC7654596)

**A. Construction of meta-network**

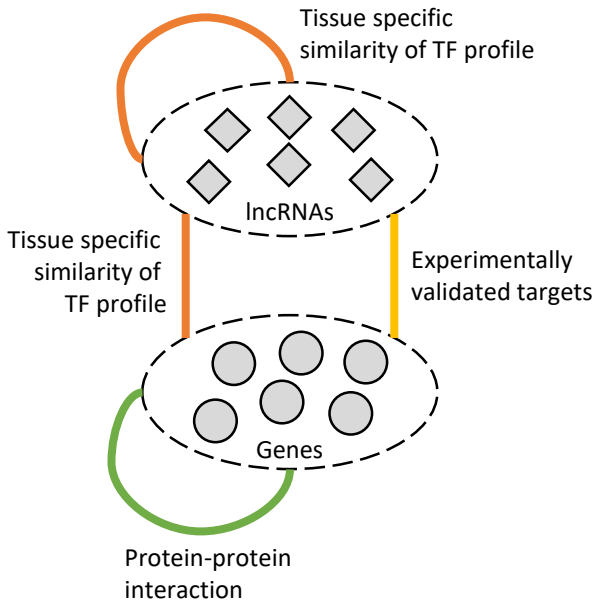

**B. Induced lncRNA – gene network**

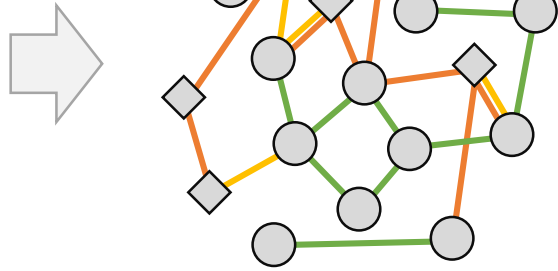

**C. Prioritizing target genes based on network propagation starting from query lncRNA**

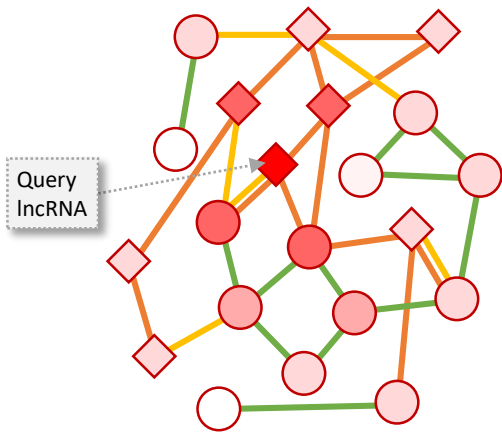

**D. Gene set enrichment analysis of molecular pathways and Gene Ontology terms based on the propagated scores**

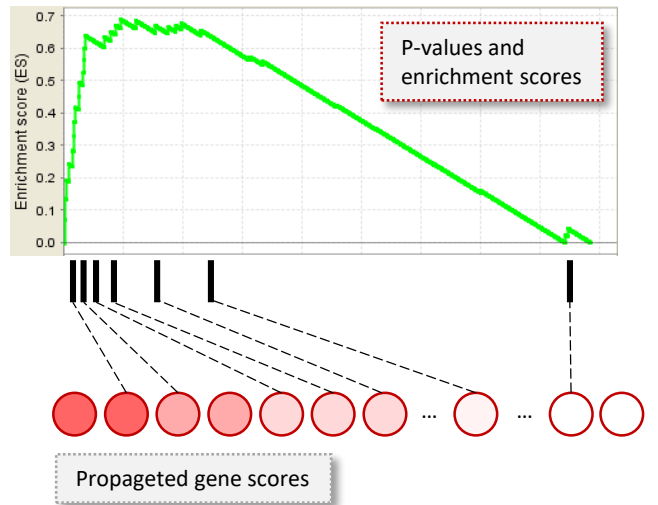

Supplement: 12967_2020_2581_MOESM1_ESM.pdf [file 12967_2020_2581_MOESM1_ESM.pdf]
