# Supplementary material
Source: PubMed Central journal article supplement (PMC7654596)
Supplement: 12967_2020_2581_MOESM3_ESM.pdf [file 12967_2020_2581_MOESM3_ESM.pdf]

**Color Key  
and Histogram**

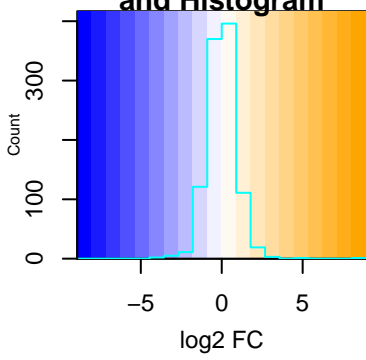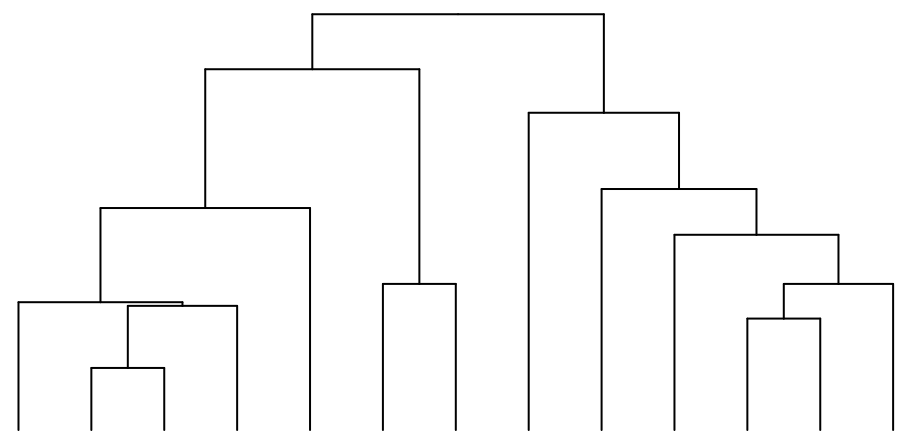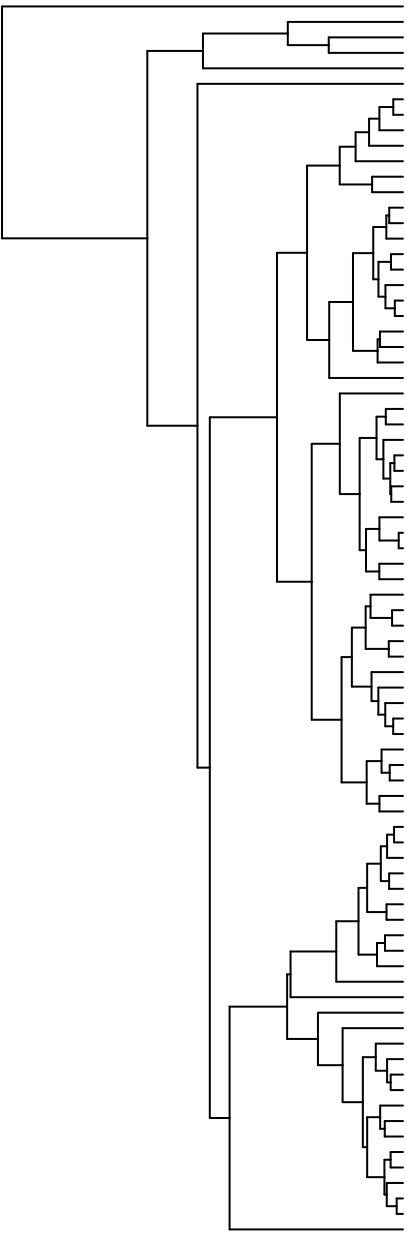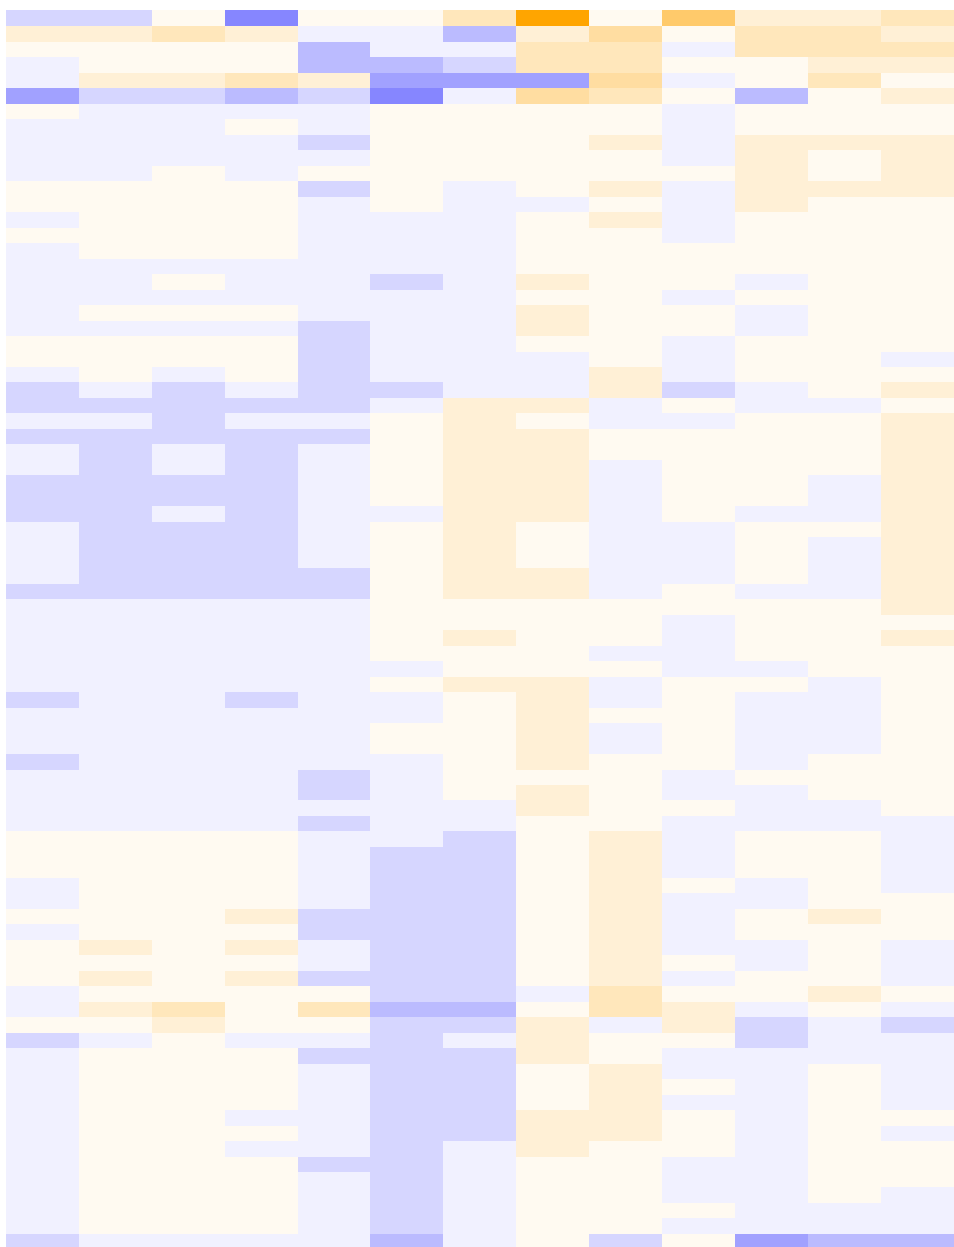

Mild asthma vs. COPD  
 Asthma vs. COPD  
 Allergic asthma vs. COPD  
 Nonallergic asthma vs. COPD  
 All. sev. asthma vs. Nonall. sev. asthma  
 Mild asthma vs. Severe asthma  
 COPD vs. Severe asthma  
 All. mild asthma vs. Nonall. mild asthma  
 Severe asthma vs. Control  
 Allergic asthma vs. Nonallergic asthma  
 Mild asthma vs. Control  
 Asthma vs. Control  
 COPD vs. Control

RP6-24A23.7  
 IQCF5-AS1  
 LINC00421  
 RP11-399K21.11  
 LINC00635  
 NAV2-AS5  
 SNHG7  
 PDXDC2P  
 RP11-473M20.16  
 FAM211A-AS1  
 RP1-239B22.5  
 MEG3  
 GAS5  
 LOC653160  
 SNHG11  
 LINC00338  
 TUG1  
 MALAT1  
 LINC00324  
 LINC00094  
 LINC00657  
 SNHG5  
 LINC00116  
 CROCCP2  
 A2ML1-AS1  
 ABCA11P  
 FGD5-AS1  
 CEP83-AS1  
 LRRC37BP1  
 HCG18  
 SIK3-IT1  
 FLJ31306  
 RP11-96D1.10  
 CTD-3185P2.1  
 NCBP2-AS2  
 NEAT1  
 HCG11  
 OIP5-AS1  
 RP11-549J18.1  
 TP73-AS1  
 RP11-84C13.1  
 ZNRD1-AS1  
 AC000120.7  
 RP11-363E7.4  
 CTC-444N24.11  
 RP11-473I1.10  
 RP11-498C9.15  
 AC007228.9  
 LL22NC03-N27C7.1  
 NUTM2A-AS1  
 RP11-367N14.3  
 AC104820.2  
 SNHG16  
 EPB41L4A-AS1  
 LINC00667  
 ZFAS1  
 GAS5-AS1  
 MCM3AP-AS1  
 RP11-1134I14.8  
 RP11-282O18.3  
 MZF1-AS1  
 RP11-29G8.3  
 SENP3-EIF4A1  
 HOTAIR  
 LINC00293  
 FGF14-IT1  
 GRM5-AS1  
 RP11-38P22.2  
 JPX  
 LINC00662  
 RP11-325K4.3  
 RP11-363G2.4  
 RP11-819C21.1  
 HNRNPU-AS1  
 AC068196.1  
 CTC-487M23.5  
 DLEU2  
 FOXN3-AS2  
 SDCBP2-AS1  
 XIST
