# Supplementary material
Source: PubMed Central journal article supplement (PMC7654596)
Supplement: 12967_2020_2581_MOESM7_ESM.pdf [file 12967_2020_2581_MOESM7_ESM.pdf]

Color Key  
and Histogram

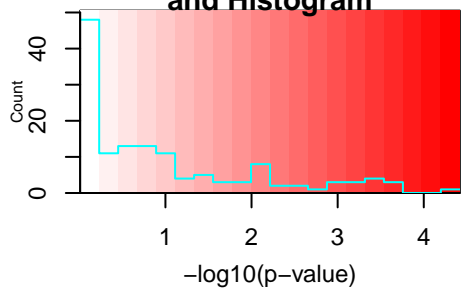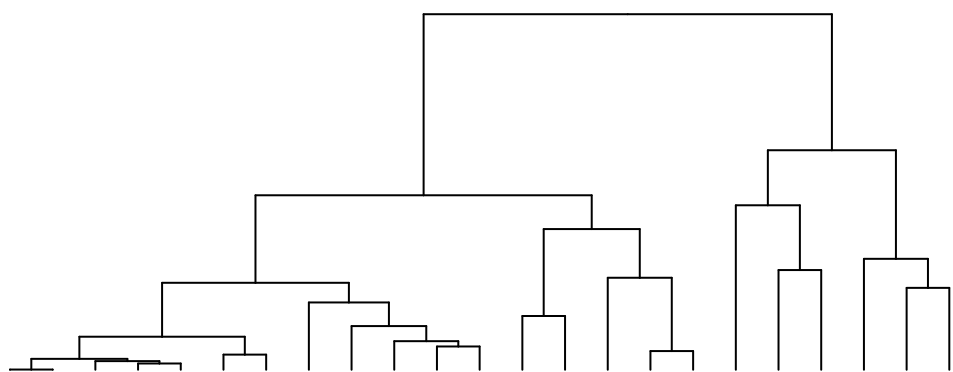

Childhood asthma vs. Childhood control  
Child mild asthma vs. Adult mild asthma  
Adult COPD vs. Adult control  
Childhood allergic asthma vs. Childhood control  
COPD vs. Control  
Child asthma vs. Adult asthma  
Allergic asthma vs. Non-allergic asthma  
Adult allergy vs. Adult allergic asthma  
Adult severe asthma vs. Adult mild asthma  
Asthma vs. Control  
Child mild allergic asthma vs. Adult mild allergic asthma  
Severe asthma vs. Mild asthma  
Allergy vs. Allergic asthma  
Asthma vs. Allergy  
Adult control vs. Child control  
Asthma vs. COPD  
Adult asthma vs. Adult COPD  
Adult allergic asthma vs. Adult non-allergic asthma  
Adult asthma vs. Adult allergy  
COPD vs. Allergy  
Allergy vs. Control  
Adult allergy vs. Adult control

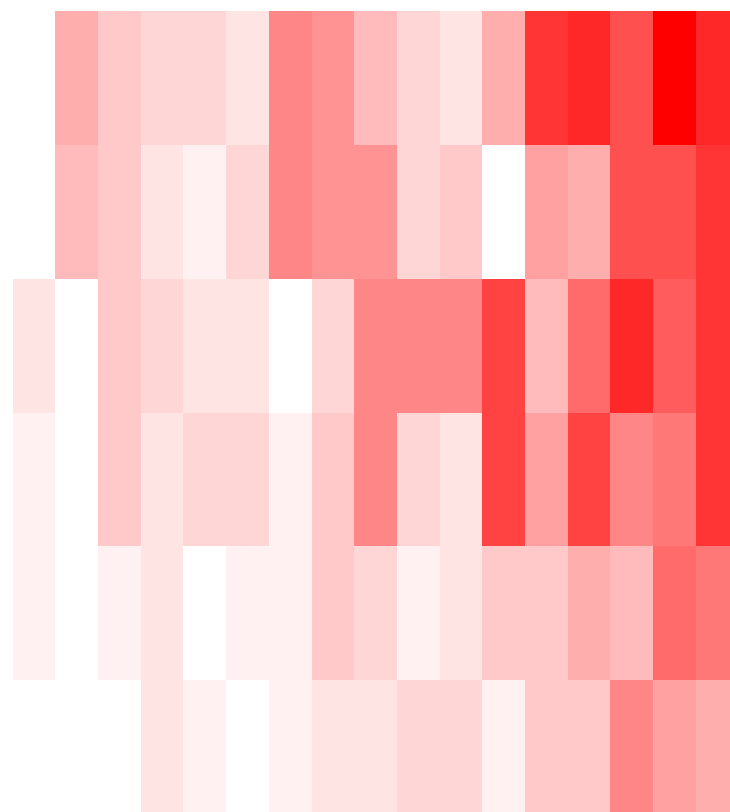

OIP5-AS1

JPX

RP11-325K4.3

HNRNPU

RP11-282O18.3

MZF1-AS1
