# Supplementary material
Source: PubMed Central journal article supplement (PMC7654596)

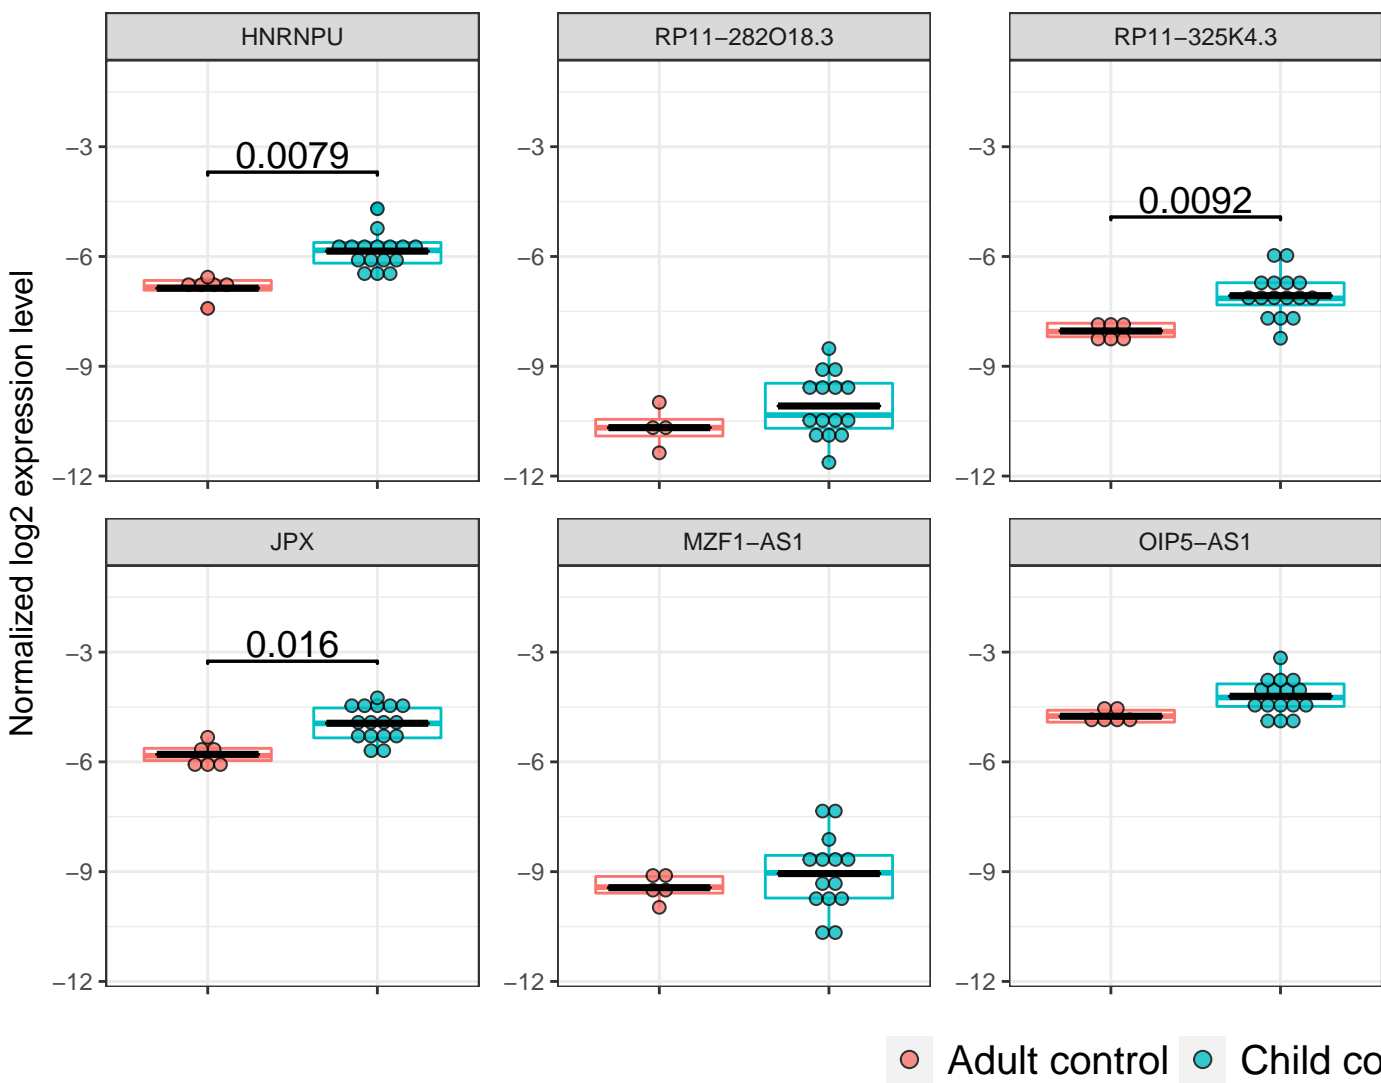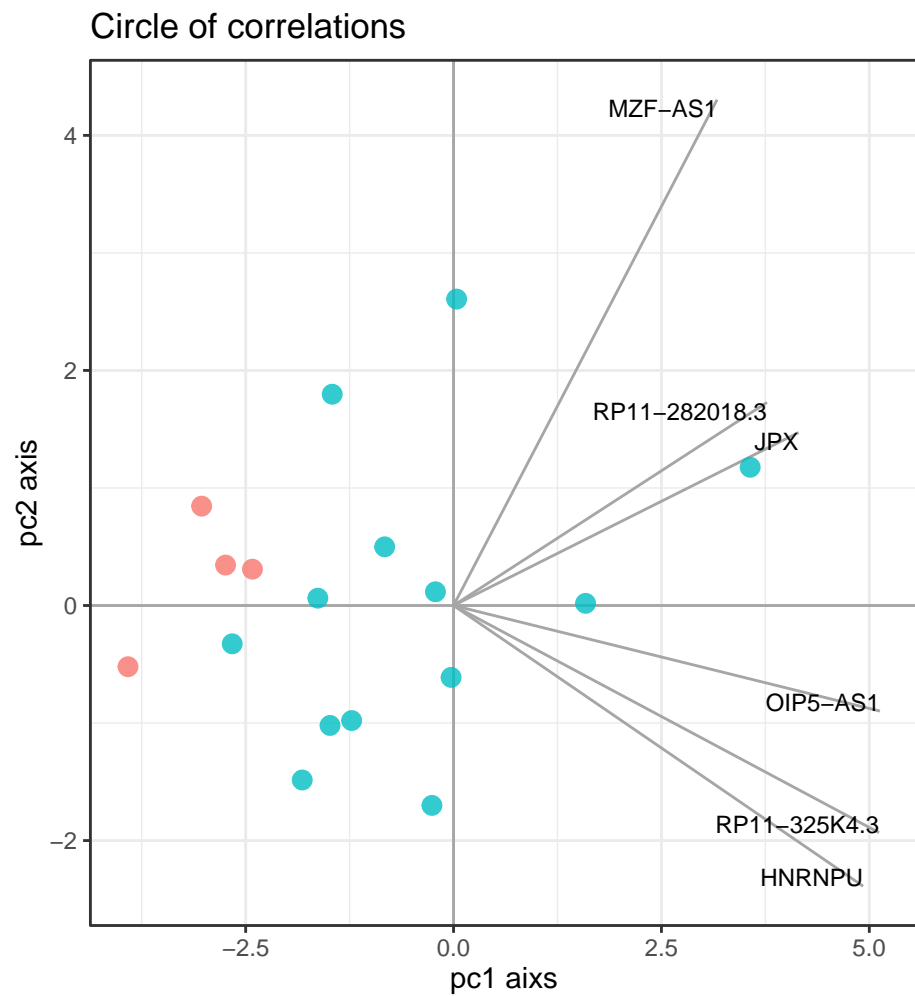

Supplement: 12967_2020_2581_MOESM8_ESM.pdf [file 12967_2020_2581_MOESM8_ESM.pdf]
