# Supplementary material
Source: PubMed Central journal article supplement (PMC7654596)
Supplement: 12967_2020_2581_MOESM14_ESM.pdf [file 12967_2020_2581_MOESM14_ESM.pdf]

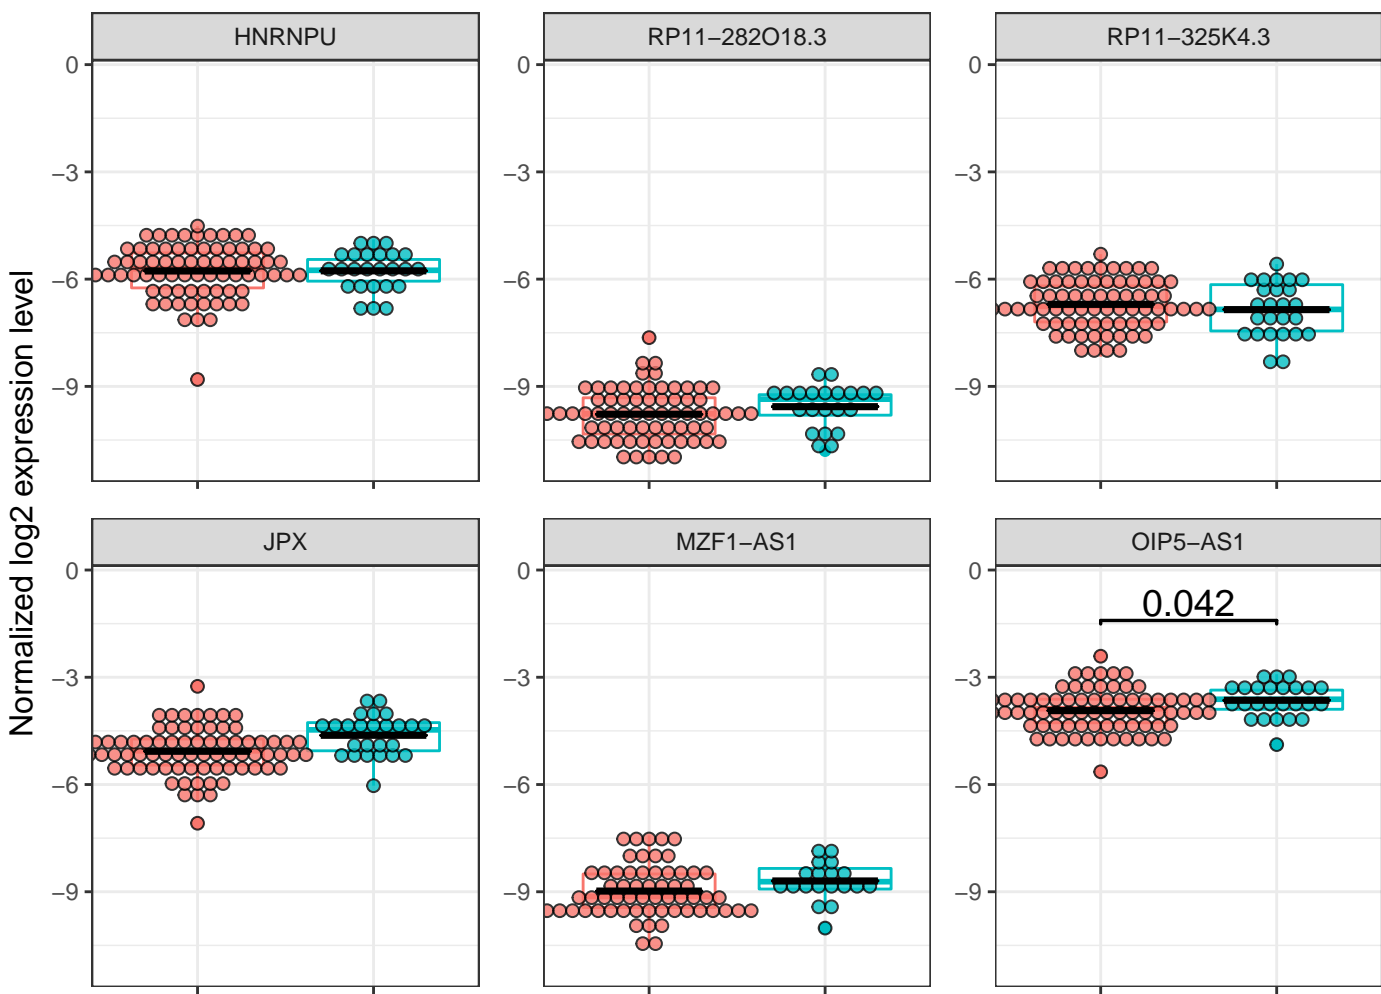

Circle of correlations

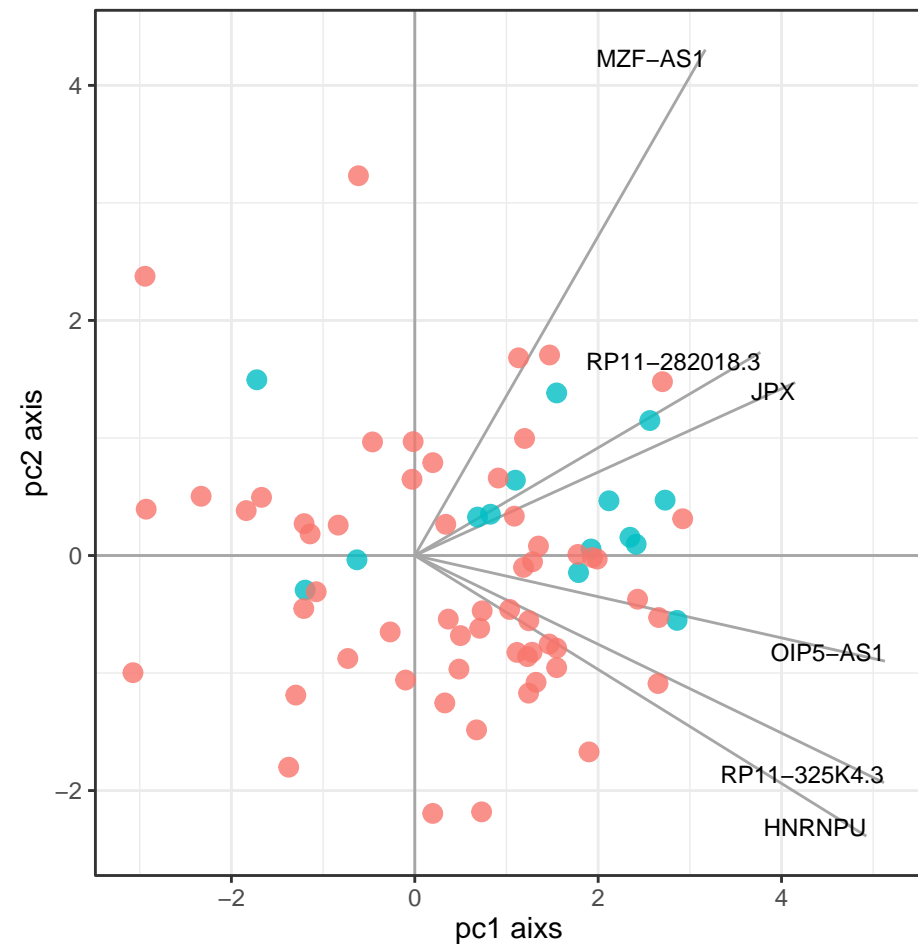

● Adult allergic asthma ● Adult allergy
